# Supplementary material for: The Transcript-centric Mutations in Human Genomes
Source: PubMed Central journal article supplement — Genomics Proteomics Bioinformatics. 2012 Mar 23;10(1):11–22. doi: 10.1016/S1672-0229(11)60029-6 (PMC5054492; doi:10.1016/s1672-0229(11)60029-6), 2012-03-23
Supplement: mmc1.pdf [file mmc1.pdf]

## **Supplementary Material**

Cui, P., *et al.* 2012. The transcript-centric mutations in human genomes. *Genomics Proteomics Bioinformatics* 10(1): 11-22.

DOI: 10.1016/S1672-0229(11)60029-6.

Tables S1-S5; Figures S1-S7



**Table S2 List of 9,732 ubiquitously-expressed genes and expression levels in 10 human tissues**

**Table S3 List of 646 EIGs**

**Table S4 Gene ontology of 646 EIGs**

| Category           | GO                                        | Term                                                        | <i>P</i> | Count    | %        |
|--------------------|-------------------------------------------|-------------------------------------------------------------|----------|----------|----------|
| Molecular Function | GO:0003735                                | structural constituent of ribosome                          | 2.93E-33 | 52       | 8.062016 |
|                    | GO:0005515                                | protein binding                                             | 2.78E-18 | 393      | 60.93023 |
|                    | GO:0008135                                | translation factor activity, nucleic acid binding           | 2.22E-04 | 13       | 2.015504 |
|                    | GO:0016491                                | oxidoreductase activity                                     | 3.92E-04 | 44       | 6.821705 |
|                    | GO:0004601                                | peroxidase activity                                         | 9.09E-04 | 7        | 1.085271 |
|                    | GO:0003676                                | nucleic acid binding                                        | 0.002698 | 147      | 22.7907  |
|                    | GO:0016787                                | hydrolase activity                                          | 0.002756 | 108      | 16.74419 |
|                    | GO:0031202                                | RNA splicing factor activity, transesterification mechanism | 0.010294 | 5        | 0.775194 |
| Biology Process    | GO:0044237                                | cellular metabolic process                                  | 2.68E-13 | 331      | 51.31783 |
|                    | GO:0045184                                | establishment of protein localization                       | 9.74E-12 | 70       | 10.85271 |
|                    | GO:0033036                                | macromolecule localization                                  | 6.41E-11 | 85       | 13.17829 |
|                    | GO:0022613                                | ribonucleoprotein complex biogenesis                        | 1.52E-08 | 26       | 4.031008 |
|                    | GO:0051641                                | cellular localization                                       | 1.50E-07 | 68       | 10.54264 |
|                    | GO:0051649                                | establishment of localization in cell                       | 1.56E-07 | 64       | 9.922481 |
|                    | GO:0044238                                | primary metabolic process                                   | 2.95E-07 | 317      | 49.14729 |
|                    | GO:0043170                                | macromolecule metabolic process                             | 6.85E-06 | 264      | 40.93023 |
|                    | GO:0051234                                | establishment of localization                               | 1.71E-05 | 139      | 21.55039 |
|                    | GO:0006810                                | transport                                                   | 2.57E-05 | 137      | 21.24031 |
|                    | GO:0016192                                | vesicle-mediated transport                                  | 2.92E-05 | 43       | 6.666667 |
|                    | GO:0009056                                | catabolic process                                           | 5.32E-05 | 75       | 11.62791 |
|                    | GO:0009058                                | biosynthetic process                                        | 1.23E-04 | 171      | 26.51163 |
|                    | GO:0065009                                | regulation of molecular function                            | 0.001331 | 56       | 8.682171 |
|                    | GO:0034621                                | cellular macromolecular complex subunit organization        | 0.002077 | 26       | 4.031008 |
|                    | GO:0008219                                | cell death                                                  | 0.002915 | 43       | 6.666667 |
|                    | GO:0055114                                | oxidation reduction                                         | 0.003355 | 39       | 6.046512 |
|                    | GO:0051128                                | regulation of cellular component organization               | 0.004188 | 30       | 4.651163 |
|                    | GO:0006413                                | translational initiation                                    | 0.006358 | 7        | 1.085271 |
|                    | GO:0042221                                | response to chemical stimulus                               | 0.007318 | 66       | 10.23256 |
|                    | GO:0016044                                | membrane organization                                       | 0.009302 | 25       | 3.875969 |
|                    | GO:0030029                                | actin filament-based process                                | 0.009466 | 18       | 2.790698 |
|                    | GO:0048523                                | negative regulation of cellular process                     | 0.010434 | 81       | 12.55814 |
|                    | GO:0043933                                | macromolecular complex subunit organization                 | 0.011104 | 40       | 6.20155  |
|                    | GO:0006996                                | organelle organization                                      | 0.011243 | 67       | 10.3876  |
|                    | GO:0022607                                | cellular component assembly                                 | 0.015403 | 47       | 7.286822 |
|                    | GO:0044087                                | regulation of cellular component biogenesis                 | 0.017935 | 12       | 1.860465 |
|                    | GO:0048522                                | positive regulation of cellular process                     | 0.018202 | 87       | 13.48837 |
|                    | GO:0048519                                | negative regulation of biological process                   | 0.028858 | 84       | 13.02326 |
|                    | GO:0051716                                | cellular response to stimulus                               | 0.036536 | 42       | 6.511628 |
|                    | GO:0044419                                | interspecies interaction between organisms                  | 0.038341 | 18       | 2.790698 |
|                    | GO:0009892                                | negative regulation of metabolic process                    | 0.040596 | 40       | 6.20155  |
|                    | GO:0070271                                | protein complex biogenesis                                  | 0.040773 | 28       | 4.341085 |
| GO:0051656         | establishment of organelle localization   | 0.044385                                                    | 7        | 1.085271 |          |
| GO:0048518         | positive regulation of biological process | 0.049274                                                    | 91       | 14.10853 |          |
| Cell Component     | GO:0044424                                | intracellular part                                          | 1.27E-35 | 519      | 80.46512 |
|                    | GO:0030529                                | ribonucleoprotein complex                                   | 1.08E-33 | 88       | 13.64341 |
|                    | GO:0005622                                | intracellular                                               | 2.32E-33 | 525      | 81.39535 |
|                    | GO:0044446                                | intracellular organelle part                                | 9.42E-29 | 281      | 43.56589 |
|                    | GO:0044422                                | organelle part                                              | 2.78E-28 | 281      | 43.56589 |
|                    | GO:0043229                                | intracellular organelle                                     | 3.50E-27 | 455      | 70.54264 |
|                    | GO:0043227                                | membrane-bounded organelle                                  | 1.45E-21 | 408      | 63.25581 |
|                    | GO:0031967                                | organelle envelope                                          | 3.45E-14 | 66       | 10.23256 |
|                    | GO:0031090                                | organelle membrane                                          | 6.78E-13 | 91       | 14.10853 |
|                    | GO:0043233                                | organelle lumen                                             | 2.07E-11 | 124      | 19.22481 |
|                    | GO:0043228                                | non-membrane-bounded organelle                              | 1.43E-08 | 150      | 23.25581 |
|                    | GO:0043234                                | protein complex                                             | 1.16E-07 | 146      | 22.63566 |
|                    | GO:0031982                                | vesicle                                                     | 1.01E-04 | 46       | 7.131783 |
|                    | GO:0044464                                | cell part                                                   | 0.001136 | 566      | 87.75194 |
|                    | GO:0031252                                | cell leading edge                                           | 0.034063 | 11       | 1.705426 |
|                    | GO:0012505                                | endomembrane system                                         | 0.040236 | 40       | 6.20155  |

Note: list was sorted by *P*-value. Only the second classification out of the five GO classes was chosen for illustration.

**Table S5 Parameters for nonlinear regression analysis**

| mutation type  | Parameters in Figure 5A |          |         |          | Parameters in Figure 5B (High exp.) |           |           |           | Parameters in Figure 5B (Low exp.) |           |           |           |
|----------------|-------------------------|----------|---------|----------|-------------------------------------|-----------|-----------|-----------|------------------------------------|-----------|-----------|-----------|
|                | C→T                     | A→G      | C→G     | G→T      | C→T                                 | A→G       | C→G       | G→T       | C→T                                | A→G       | C→G       | G→T       |
| e              | 10                      | 5.5      | 6       | 5        | 1.2                                 | 1         | 0.8       | 0.8       | 1.2                                | 0.5       | 0.4       | 0.4       |
| h              | 200                     | 175      | 20      | 170      | 0                                   | 160       | 230       | 10        | 30                                 | 10        | 250       | 160       |
| f              | 176                     | 176      | 233     | 176      | 176                                 | 176       | 233       | 176       | 176                                | 176       | 233       | 176       |
| B0             | 30.51                   | 5.03     | 13.12   | 11.73    | 5.07                                | 1.47      | 2.16      | 1.33      | 4.05                               | 0.31      | 1.04      | 0.70      |
| B1             | -0.1                    | 7.5E-4   | -2.7E-3 | -0.05042 | -0.01135                            | -0.002601 | -0.005453 | -0.004128 | -0.01564                           | 0.0003108 | -0.004825 | -0.003314 |
| B2             | 0.0001                  | -1.1E-05 | 1.2E-05 | 6.6E-05  | 9.4E-6                              | 2.1E-06   | 5.2E-06   | 4.9E-06   | 1.9E-05                            | -1.3E-06  | 7.5E-06   | 4.2E-06   |
| B3             | -4E-08                  | 6.7E-09  | 3.7E-09 | -2.5E-08 | -1.8E-09                            | -6.7E-10  | -1.3E-09  | -1.6E-09  | -7.3E-09                           | 7.9E-10   | -3.3E-09  | -1.5E-09  |
| R <sup>2</sup> | 0.22                    | -1.112   | 0.06983 | 0.2411   | 0.4329                              | -0.5063   | 0.2161    | -0.06369  | 0.731                              | -1.038    | 0.2909    | -0.1742   |

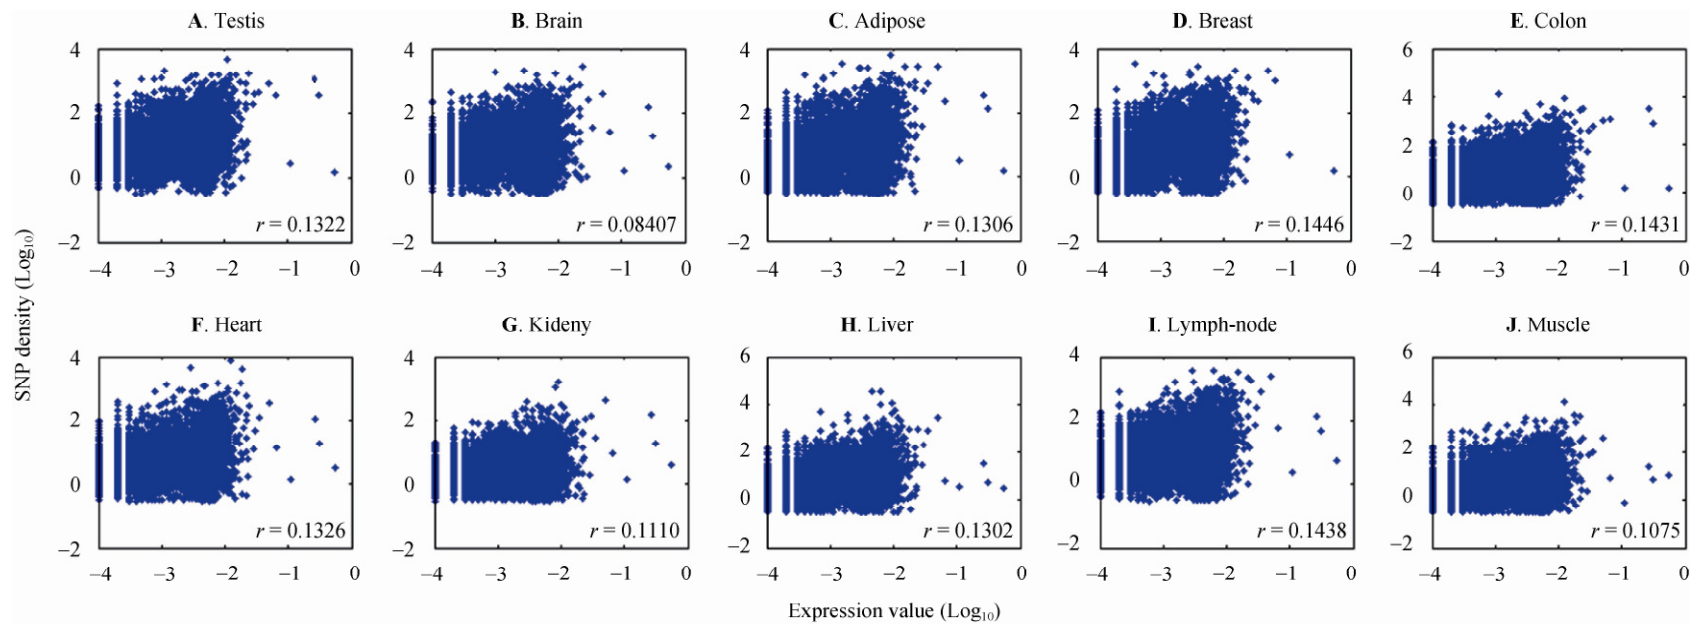

**Figure S1** Correlations between expression levels (Log<sub>10</sub>) and SNP densities of 9,732 ubiquitously-expressed genes in 10 human tissues examined. Panels A to J show data for different tissues including testis, brain, adipose, breast, colon, heart, kidney, liver, lymph-node and muscle. All  $P < 0.0001$ .

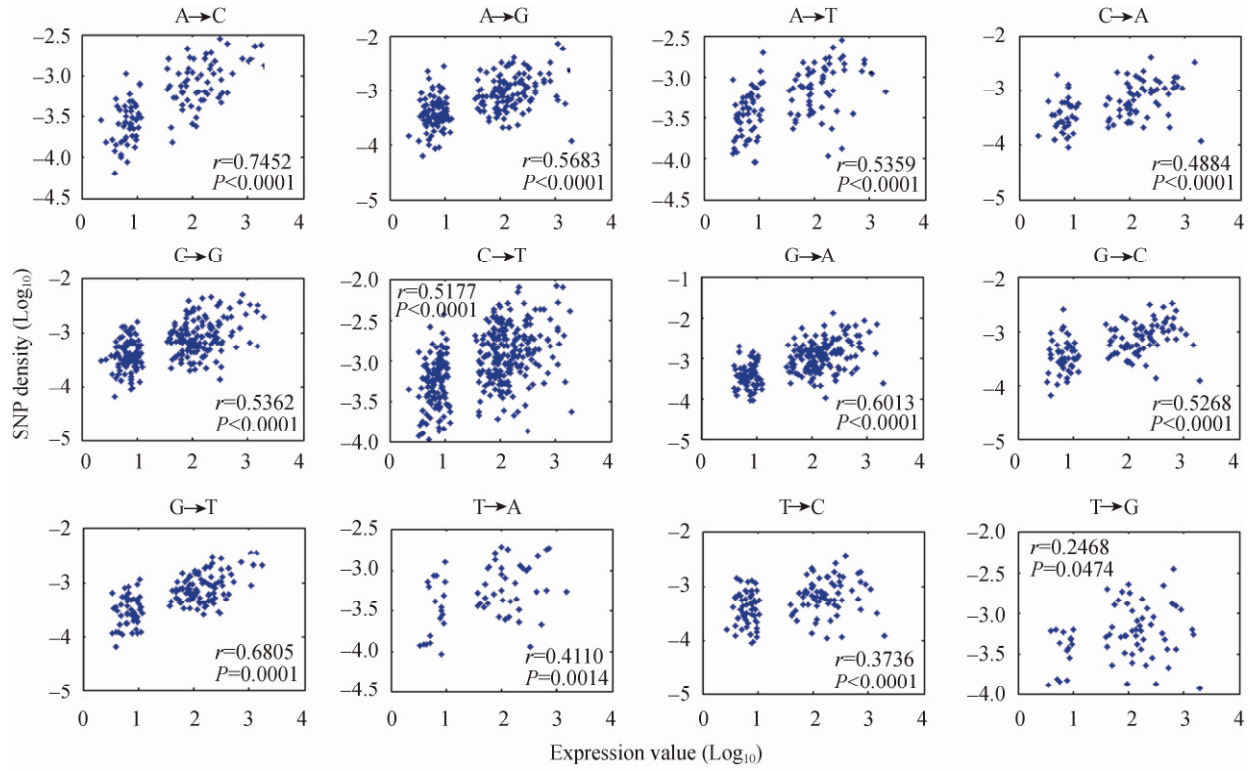

**Figure S2** Correlations between the expression intensity of EIGs and the density of each substitution type. The substitutions are categorized based on analyses of alleles in the human genome referenced to chimpanzee genome for ancestor alleles.



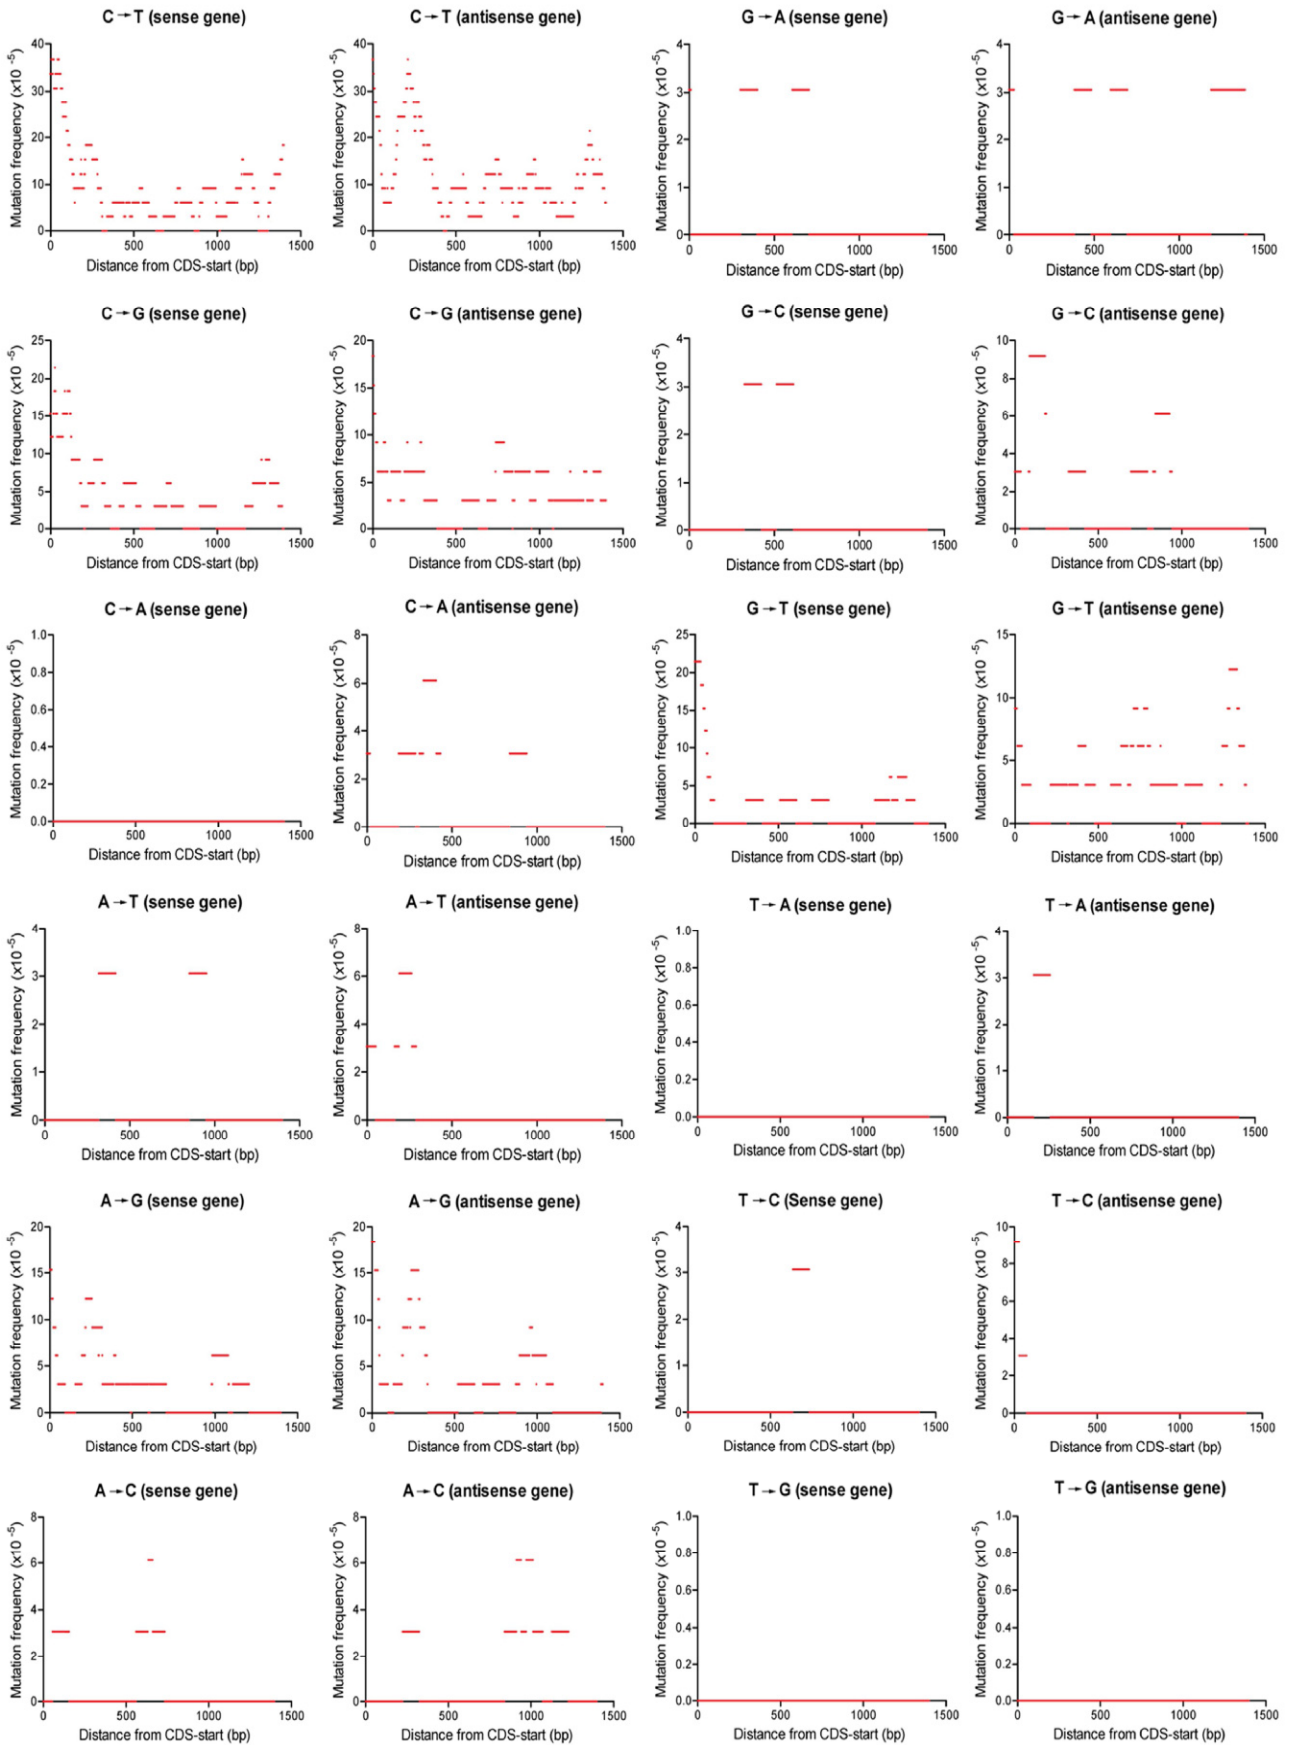

**Figure S3** Average mutation frequencies plotted across EIGs. The mutation types C→T, A→G, C→G and G→T show periodicities in these TUs.

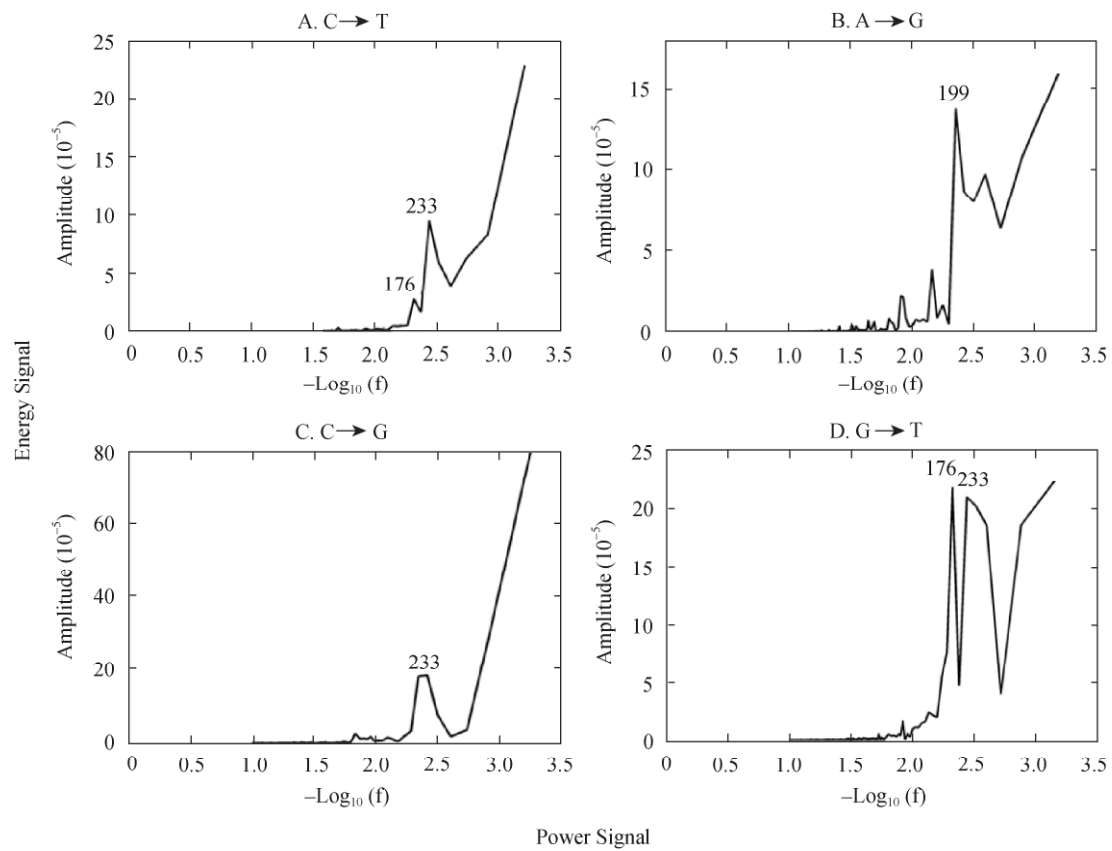

**Figure S4** Power spectrum analyses of mutation frequencies. Periodicities correspond to peaks above the baseline in the plots. The major peaks for C→T (**A**), A→G (**B**), C→G (**C**) and G→T (**D**) were found at a length of either 176 nt or 233 nt.

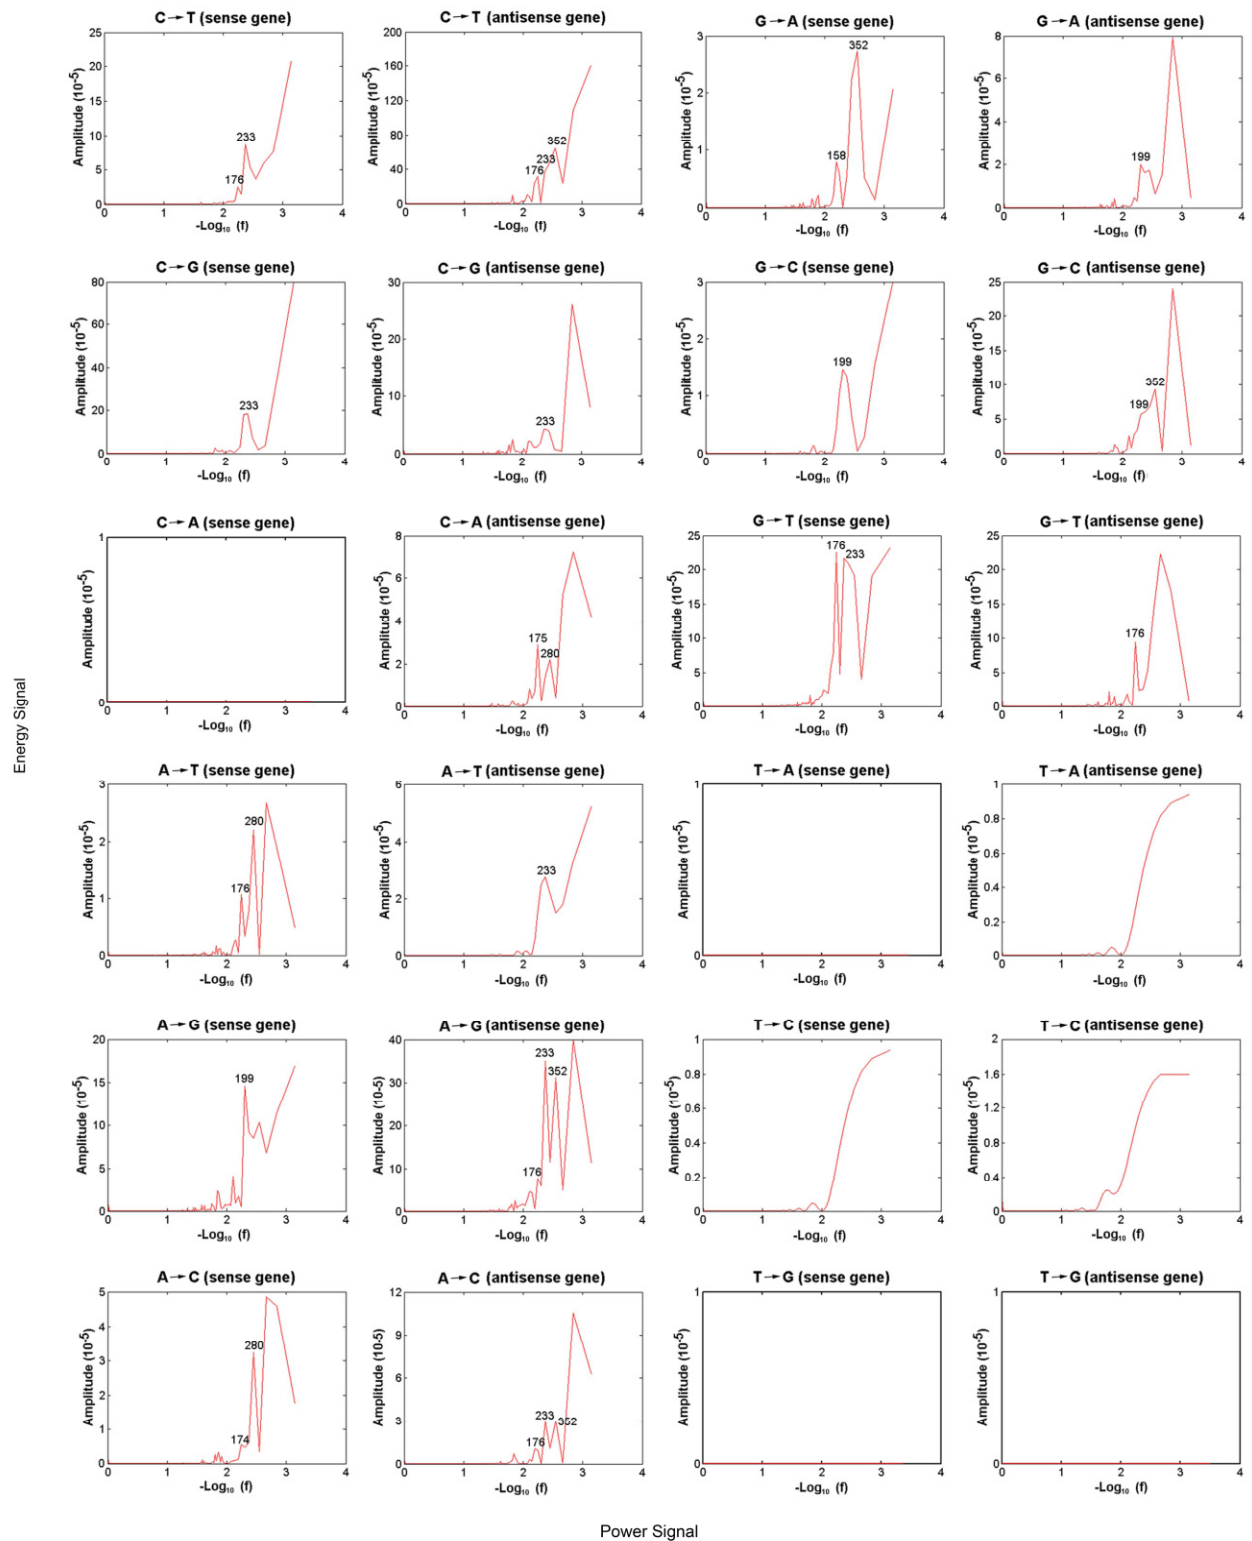

**Figure S5** Power spectrum analyses of mutation frequencies among EIGs. Periodicities are shown as peaks above the baseline and appear fluctuating when different gene sets (sense-strands and antisense-strands genes) are used for the analyses, probably caused by statistical errors. The orientation of the genes (Sense, 5' to 3' in a DNA strand; antisense, on the opposite strand) was determined based on the annotated chromosome strands.

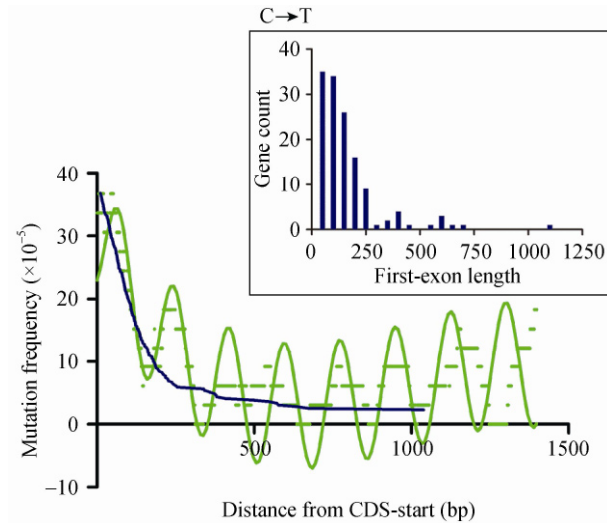

**Figure S6** The mutation gradient and periodicity extending from CDS-start to intronic regions. The blue curve indicates the boundary of the first exons and introns, which suggest that the mutation gradient and periodicity are also present in intronic regions of TUs. The insets show the length distribution of the first exons.

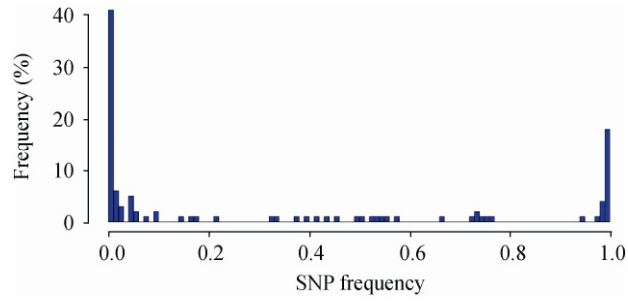

**Figure S7** The distribution of allele frequencies in sampled populations. Most mutations are minor alleles in the populations.
